# Supplementary material for: Surface basicity mediated rapid and selective adsorptive removal of Congo red over nanocrystalline mesoporous CeO2
Source: Royal Society of Chemistry journal article supplement (doi:10.1039/d1na00412c), 2021-01-01
Supplement: d1na00412c1.pdf [file d1na00412c1.pdf]

### Electronic Supplementary Information

## Surface basicity mediated rapid and selective adsorptive removal of Congo red over nanocrystalline mesoporous CeO<sub>2</sub>

Deepak Joshy<sup>a</sup>, Seena Chakko<sup>a</sup>, Yahya A. Ismail<sup>a</sup>, Pradeepan Periyat<sup>\*a, b</sup>

<sup>a</sup>Department of Chemistry, University of Calicut, Kerala, India-673635.

<sup>b</sup>Department of Environmental Studies, Kannur University, Kerala, India

E-mail: [pperiyat@uoc.ac.in](mailto:pperiyat@uoc.ac.in)/[pperiyat@kannuruniv.ac.in](mailto:pperiyat@kannuruniv.ac.in)

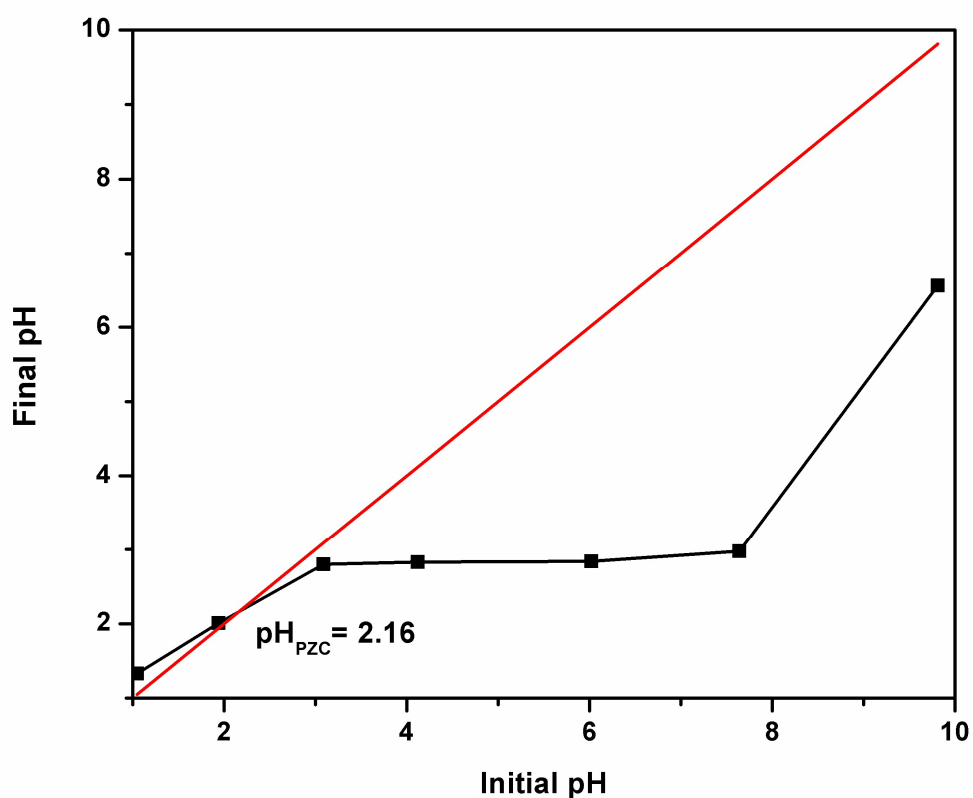

Fig. S1 The plot showing the determination of pH<sub>PZC</sub> by pH drift method.
